# Supplementary material for: Key Genes Identified in Nonsyndromic Microtia by the Analysis of Transcriptomics and Proteomics
Source: PubMed Central journal article supplement — ACS Omega. 2022 May 13;7(20):16917–27. doi: 10.1021/acsomega.1c07059 (PMC9134388; doi:10.1021/acsomega.1c07059), 2022-05-13
Supplement: ao1c07059_si_006.pdf [file ao1c07059_si_006.pdf]

**Key Genes Identified in Nonsyndromic Microtia by Analysis of  
Transcriptomics and Proteomics**

Xin Chen<sup>1,\*</sup>, Yuexin Xu<sup>4,\*</sup>, Chenlong Li<sup>2,\*</sup>, Xinyu Lu<sup>1</sup>, Yaoyao Fu<sup>2</sup>, Qingqing Huang<sup>5</sup>,  
Duan Ma<sup>4,#</sup>, Jing Ma<sup>1,2,#</sup>, and Tianyu Zhang<sup>1,2,3,#</sup>

<sup>1</sup>ENT institute, Eye & ENT Hospital, Fudan University, Shanghai 200031, China;

<sup>2</sup>Department of Facial Plastic and Reconstructive Surgery, Eye & ENT Hospital, Fudan University, Shanghai 200031, China;

<sup>3</sup>NHC Key Laboratory of Hearing Medicine, Fudan University, Shanghai 200031, China;

<sup>4</sup>Key Laboratory of Metabolism and Molecular Medicine, Ministry of Education, Department of Biochemistry and Molecular Biology, School of Basic Medical Sciences, Fudan University, Shanghai 200032, China;

<sup>5</sup>Department of Bioinformatics, Medical Laboratory of Nantong Zhongke, Nantong, Jiangsu 226133, China;

\*These authors contributed equally to this work;

#Corresponding authors

Tianyu Zhang,

postal code: 200031; tel: 021-64377134; e-mail: ty\_zhang2021@163.com

Jing Ma,

postal code: 200031; tel: 021-64377134; e-mail: mj19815208@yeah.net

Duan Ma,

postal code: 200032; tel: 021-54237441; e-mail: duanma@fudan.edu.cn

## **Supplementary Figures**

**Figure S1.** KEGG analysis for TFs and their target genes enriched in the blue, dark red, and dark turquoise modules.

**Figure S2.** Distribution features of gene expression before and after normalization of data among CS and NSM samples.

**Figure S1.**

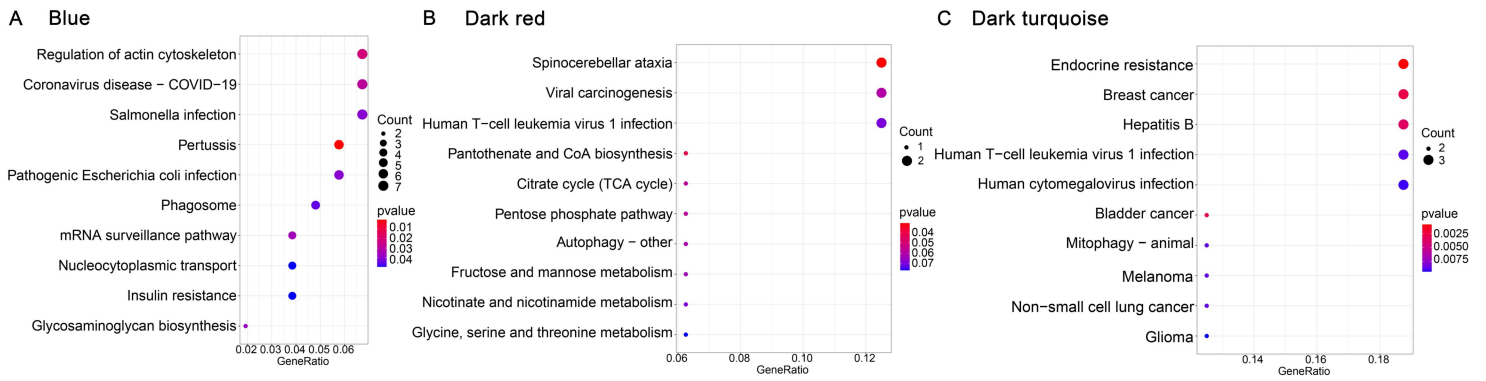

**Figure S1.** KEGG analysis for TFs and their target genes enriched in the blue, dark red, and dark turquoise modules. The size of the dot represents gene count, and the color represents the P value.  $P < 0.05$  is considered to be statistically significant.

**Figure S2.**

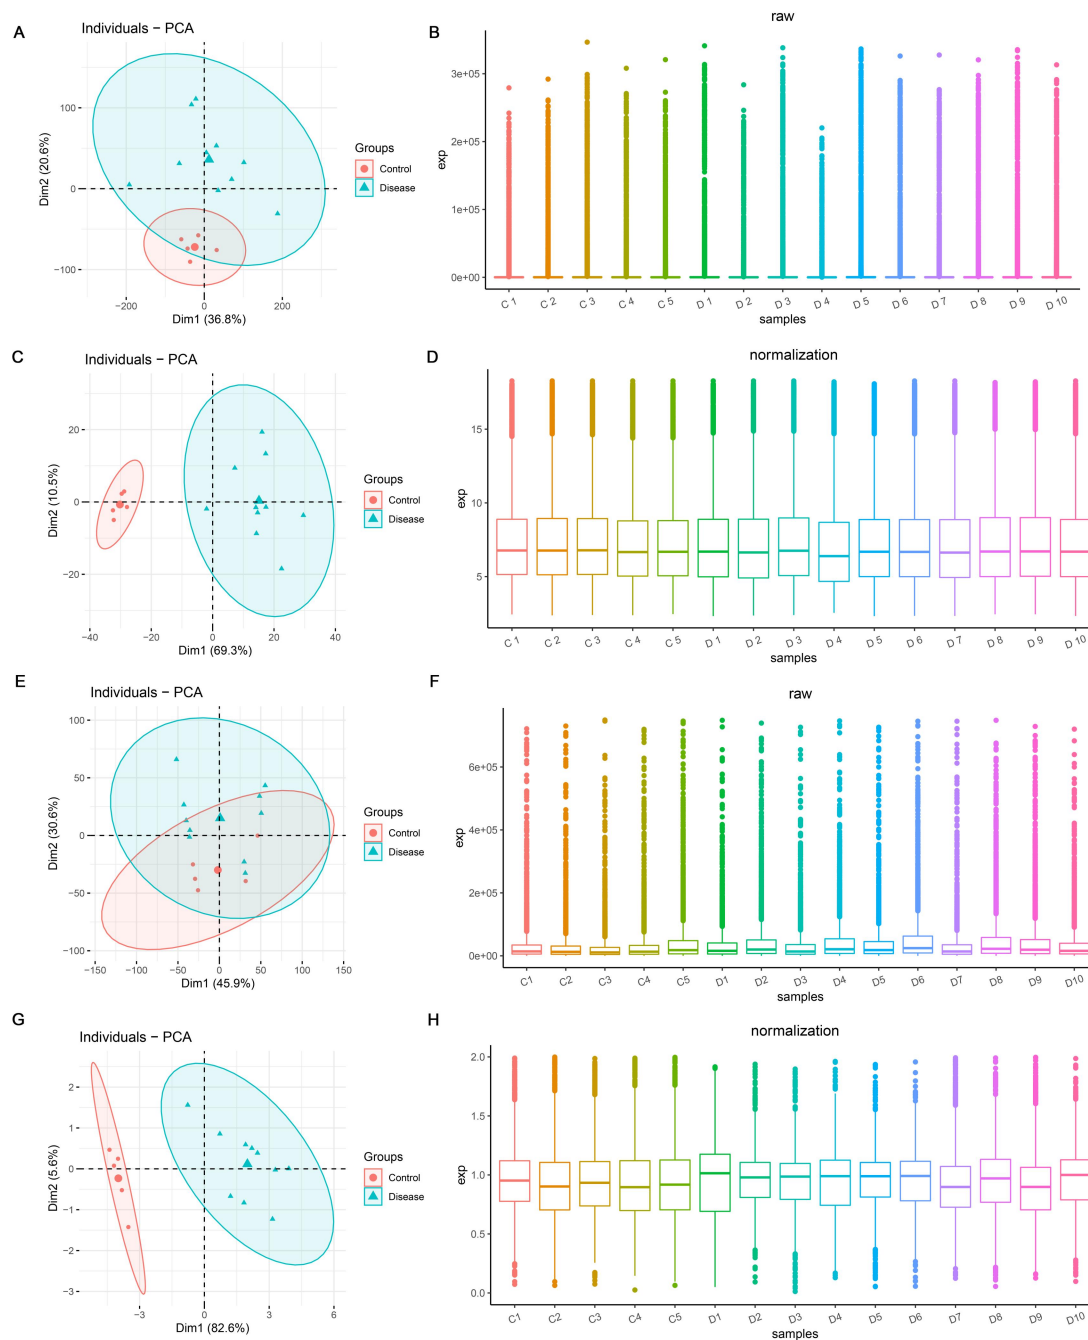

**Figure S2.** Distribution features of gene expression before and after normalization of data among CS and NSM samples. A-B. Transcriptomics data before normalization. C-D. Transcriptomics data after normalization. E-F. Proteomics data before normalization. G-H. Proteomics data after normalization. A, C, E, G. PCA. The red dots represent the CS group and the blue dots represent the NSM group. B, D, F, H. Box plot. The horizontal axis stands for different samples, while the vertical axis represents expression value. The horizontal line within each box represents the median, and the top and bottom of each box indicate the 75th and 25th percentile.
